# Supplementary material for: Genome-Assisted Characterization of Lactobacillus fermentum, Weissella cibaria, and Weissella confusa Strains Isolated from Sorghum as Starters for Sourdough Fermentation
Source: PubMed Central journal article supplement (PMC7565839; doi:10.3390/microorganisms8091388), 2020-09-10
Supplement: microorganisms-08-01388-s001.pdf [file microorganisms-08-01388-s001.pdf]

Article

# Genome-Assisted Characterisation of *Lactobacillus fermentum*, *Weissella cibaria*, and *Weissella confusa* Strains Isolated from Sorghum as Starters for Sourdough Fermentation

Irene Falasconi <sup>1,†</sup>, Alessandra Fontana <sup>1,†</sup>, Vania Patrone <sup>1,\*</sup>, Annalisa Rebecchi <sup>2</sup>, Guillermo Duserm Garrido <sup>1</sup>, Laura Principato <sup>1</sup>, Maria Luisa Callegari <sup>2</sup>, Giorgia Spigno <sup>1</sup> and Lorenzo Morelli <sup>1</sup>

<sup>1</sup> Department for Sustainable Food Process (DiSTAS), Università Cattolica del Sacro Cuore, 29122 Piacenza, Italy; irene.falasconi@unicatt.it (I.F.), alessandra.fontana@unicatt.it (A.F.), guillermo.dusermgarrido@unicatt.it (G.D.G.), laura.principato@unicatt.it (L.P.), giorgia.spigno@unicatt.it (G.S.), lorenzo.morelli@unicatt.it (L.M.)

<sup>2</sup> Biotechnological Research Centre, Università Cattolica del Sacro Cuore, 26100 Cremona, Italy; annalisa.rebecchi@unicatt.it (A.R.), marialuisa.callegari@unicatt.it (M.L.C.),

<sup>†</sup> These authors contributed equally to this work

\* Correspondence: vania.patrone@unicatt.it

**Supplementary materials**

**Table S1.** Lactic acid bacteria detected during the back-slopping procedure in sorghum sourdoughs. In brackets, the number of strains isolated for each species.

| No. of isolates | Identified species                     | Fermentation days |   |   |   |   |    |
|-----------------|----------------------------------------|-------------------|---|---|---|---|----|
|                 |                                        | 0                 | 1 | 3 | 6 | 8 | 10 |
| 15              | <i>Weissella paramesenteroides</i> (2) |                   |   |   |   |   |    |
| 6               | <i>Weissella cibaria</i> (3)           |                   |   |   |   |   |    |
| 39              | <i>Weissella confusa</i> (5)           |                   |   |   |   |   |    |
| 58              | <i>Pediococcus pentosaceus</i> (6)     |                   |   |   |   |   |    |
| 16              | <i>Pediococcus acidilactici</i> (1)    |                   |   |   |   |   |    |
| 40              | <i>Lactobacillus fermentum</i> (2)     |                   |   |   |   |   |    |
| 4               | <i>Lactococcus taiwanensis</i> (1)     |                   |   |   |   |   |    |

**Table S2.** MIC ( $\mu\text{g/mL}$ ) of antibiotics exhibited by the strains isolated in this study.

| Microorganism                | Am       | Gm        | Km        | Sm        | Em       | Cl       | Tc       | Cm       | Nm       |
|------------------------------|----------|-----------|-----------|-----------|----------|----------|----------|----------|----------|
| <i>W. cibaria</i> (UC4051)   | 1        | 1         | 64        | 32        | 1        | 0.06     | 4        | 4        | 1        |
| <i>W. confusa</i> (UC4052)   | 2        | 1         | 32        | 16        | 0.5      | 0.25     | 8        | 4        | 1        |
| <b>EFSA cut-off values*</b>  | <b>2</b> | <b>16</b> | <b>32</b> | <b>64</b> | <b>1</b> | <b>1</b> | <b>8</b> | <b>4</b> | <b>-</b> |
| <i>L. fermentum</i> (UC3641) | 0.5      | 1         | 32        | 16        | 0.5      | 0.12     | 8        | 4        | 2        |
| <b>EFSA cut-off values</b>   | <b>2</b> | <b>16</b> | <b>32</b> | <b>64</b> | <b>1</b> | <b>1</b> | <b>8</b> | <b>4</b> | <b>-</b> |

Antibiotics abbreviations: Am ampicillin, Gm gentamycin, Km kanamycin, Sm streptomycin, Em erythromycin, Cl clindamycin, Tc tetracycline, Cm chloramphenicol, Nm neomycin. \*these cut offs are the ones of obligate heterofermentative lactobacilli.

**Table S3.** General features of the three sequenced genomes, *W. cibaria* UC4051, *W. confusa* UC4052 and *L. fermentum* UC3641, isolated from sorghum sourdough.

|                       | <i>W. cibaria</i> UC4051 | <i>W. confusa</i> UC4052 | <i>L. fermentum</i> UC3641 |
|-----------------------|--------------------------|--------------------------|----------------------------|
| Chromosome size (Mbp) | 2.44                     | 2.33                     | 1.97                       |
| GC content (%)        | 44.74                    | 44.54                    | 51.70                      |
| Scaffolds             | 56                       | 22                       | 130                        |
| tRNAs                 | 81                       | 82                       | 58                         |
| rRNAs                 | 9                        | 11                       | 6                          |
| CDS                   | 2,293                    | 2,243                    | 1,923                      |
| CRISPR                | 0                        | 0                        | 2                          |
| Prophage regions      | 1                        | 2                        | 0                          |
